# Supplementary material for: Immunostimulation of Parasteatoda tepidariorum (Araneae: Theridiidae) in juvenile and adult stages. Immunity reactions to injury with foreign body and Bacillus subtilis infection
Source: PeerJ. 2023 Jul 17;11:e15337. doi: 10.7717/peerj.15337 (PMC10358339; doi:10.7717/peerj.15337)
Supplement: Supplemental Information 1 — C—control group, S—group stimulated with sterile nylon fiber, S + I—group stimulated with nylon fiber coated with Bacillus subtilis bacteria. [file peerj-11-15337-s001.xlsx]

## Sheet: all results
	lysozyme absorbance	HSP70 absorbance	lys absorbance - neg.	HSP absorbance - neg.	total protein [µg/ml]	lys from protein curve [µg/100µl]	lys [µg/ml]	µg lys/µg total protein	µg lys/mg total protein	HSP70 from protein curve µg/100µl	hsp70 [µg/ml]	µg hsp70/µg total protein	µg hsp70/mg total protein
ADULT C 1	0.2971	0.40893	0.1692	0.28103	531.8	0.0261243	0.261243	0.000491243	0.491243	0.04739	0.4739	0.000891125	0.891125
ADULT C 2	0.3211	0.405942	0.1932	0.278042	531.8	0.0306882	0.306882	0.000577063	0.577063	0.0468219	0.468219	0.000880442	0.880442
ADULT C 3	0.3433	0.3774	0.2154	0.2495	531.8	0.0349098	0.349098	0.000656445	0.656445	0.0413943	0.413943	0.00077838	0.77838
ADULT C 4	0.3526	0.3	0.2247	0.1721	531.8	0.0366783	0.366783	0.0006897	0.6897	0.0266758	0.266758	0.000501613	0.501613
ADULT C 5	0.32201	0.410893	0.19411	0.282993	531.8	0.0308612	0.308612	0.000580317	0.580317	0.0477633	0.477633	0.000898145	0.898145
ADULT C 6	0.3421	0.361089	0.2142	0.233189	531.8	0.0346816	0.346816	0.000652155	0.652155	0.0382925	0.382925	0.000720055	0.720055
ADULT S 1	0.5259	0.574	0.398	0.4461	823.375	0.0696332	0.696332	0.000845704	0.845704	0.0787799	0.787799	0.000956793	0.956793
ADULT S 2	0.676	0.693999	0.5481	0.566099	823.375	0.0981763	0.981763	0.00119236	1.19236	0.101599	1.01599	0.00123393	1.23393
ADULT S 3	0.4674	0.5349	0.3395	0.407	823.375	0.0585088	0.585088	0.000710597	0.710597	0.0713446	0.713446	0.00086649	0.86649
ADULT S 4	0.551	0.70656	0.4231	0.57866	823.375	0.0744062	0.744062	0.000903674	0.903674	0.103988	1.03988	0.00126294	1.26294
ADULT S 5	0.411	0.5572	0.2831	0.4293	531.8	0.0477837	0.477837	0.000898527	0.898527	0.0755852	0.755852	0.00142131	1.42131
ADULT S 6	0.459	0.606	0.3311	0.4781	531.8	0.0569114	0.569114	0.00107017	1.07017	0.084865	0.84865	0.00159581	1.59581
ADULT S+I 1	0.6693	0.733	0.5414	0.6051	531.8	0.0969023	0.969023	0.00182216	1.82216	0.109015	1.09015	0.00204993	2.04993
ADULT S+I 2	0.794099	0.8497	0.666199	0.7218	531.8	0.120634	1.20634	0.00226841	2.26841	0.131207	1.31207	0.00246723	2.46723
ADULT S+I 3	0.597	1.0476	0.4691	0.9197	531.8	0.0831536	0.831536	0.00156363	1.56363	0.16884	1.6884	0.00317488	3.17488
ADULT S+I 4	0.899109	0.9302	0.771209	0.8023	531.8	0.140603	1.40603	0.00264391	2.64391	0.146515	1.46515	0.00275508	2.75508
ADULT S+I 5	0.914003	1.3934	0.786103	1.2655	823.375	0.143435	1.43435	0.00174204	1.74204	0.234598	2.34598	0.00284922	2.84922
ADULT S+I 6	1.2487	1.03994	1.1208	0.91204	823.375	0.207082	2.07082	0.00251504	2.51504	0.167384	1.67384	0.0020329	2.0329
JUV C 1	0.3254	0.4316	0.1975	0.3037	531.8	0.0315059	0.315059	0.000592439	0.592439	0.051701	0.51701	0.000972189	0.972189
JUV C 2	0.2992	0.4297	0.1713	0.3018	531.8	0.0265237	0.265237	0.000498753	0.498753	0.0513397	0.513397	0.000965395	0.965395
JUV C 3	0.2667	0.4319	0.1388	0.304	531.8	0.0203434	0.203434	0.000382539	0.382539	0.051758	0.51758	0.000973261	0.973261
JUV C 4	0.2505	0.406001	0.1226	0.278101	531.8	0.0172628	0.172628	0.000324611	0.324611	0.0468331	0.468331	0.000880653	0.880653
JUV C 5	0.2667	0.4339	0.1388	0.306	531.8	0.0203434	0.203434	0.000382539	0.382539	0.0521384	0.521384	0.000980413	0.980413
JUV C 6	0.25	0.4809	0.1221	0.353	531.8	0.0171677	0.171677	0.000322823	0.322823	0.0610759	0.610759	0.00114848	1.14848
JUV S 1	0.323692	0.748	0.195792	0.6201	823.375	0.0311811	0.311811	0.000378698	0.378698	0.111868	1.11868	0.00135865	1.35865
JUV S 2	0.403	0.7089	0.2751	0.581	823.375	0.0462624	0.462624	0.000561863	0.561863	0.104433	1.04433	0.00126835	1.26835
JUV S 3	0.525199	0.832934	0.397299	0.705034	823.375	0.0694999	0.694999	0.000844085	0.844085	0.128019	1.28019	0.00155481	1.55481
JUV S 4	0.477369	0.749998	0.349469	0.622098	823.375	0.0604045	0.604045	0.00073362	0.73362	0.112248	1.12248	0.00136326	1.36326
JUV S 5	0.322237	0.780293	0.194337	0.652393	823.375	0.0309044	0.309044	0.000375338	0.375338	0.118009	1.18009	0.00143323	1.43323
JUV S 6	0.410196	0.814169	0.282296	0.686269	823.375	0.0476308	0.476308	0.000578482	0.578482	0.124451	1.24451	0.00151147	1.51147
JUV S+I 1	0.797799	0.9384	0.669899	0.8105	823.375	0.121338	1.21338	0.00147366	1.47366	0.148075	1.48075	0.00179839	1.79839
JUV S+I 2	0.5931	0.9722	0.4652	0.8443	823.375	0.082412	0.82412	0.0010009	1.0009	0.154502	1.54502	0.00187645	1.87645
JUV S+I 3	0.61458	0.9504	0.48668	0.8225	823.375	0.0864967	0.864967	0.00105051	1.05051	0.150357	1.50357	0.0018261	1.8261
JUV S+I 4	0.62	1.1172	0.4921	0.9893	823.375	0.0875273	0.875273	0.00106303	1.06303	0.182075	1.82075	0.00221133	2.21133
JUV S+I 5	0.5829	0.840998	0.455	0.713098	823.375	0.0804724	0.804724	0.000977348	0.977348	0.129553	1.29553	0.00157343	1.57343
JUV S+I 6	0.43167	0.7073	0.30377	0.5794	531.8	0.0517143	0.517143	0.000972439	0.972439	0.104128	1.04128	0.00195804	1.95804
NEG. CONTROL	0.1279
