# Supplementary material for: Immunostimulation of Parasteatoda tepidariorum (Araneae: Theridiidae) in juvenile and adult stages. Immunity reactions to injury with foreign body and Bacillus subtilis infection
Source: PeerJ. 2023 Jul 17;11:e15337. doi: 10.7717/peerj.15337 (PMC10358339; doi:10.7717/peerj.15337)
Supplement: Supplemental Information 2 — C—control group, S—group stimulated with sterile nylon fiber, S + I—group stimulated with nylon fiber coated with Bacillus subtilis bacteria. [file peerj-11-15337-s002.xlsx]

## Sheet: all  results
SAMPLE	LIVE	EARLY APOPTOTIC [%]	LATE APOPTOTIC [%]	DEAD [%]	TOTAL APOPTOTIC [%]
Adult C 1	90.85	8.75	0.05	0.35	8.8
Adult C 2	92	7	0.5	0.5	7.5
Adult C 3	92.15	7.75	0	0.1	7.75
Adult C 4	90.2	9.2	0.3	0.3	9.5
Adult C 5	91.7	8	0.05	0.25	8.05
Adult C 6	89.2	10.5	0.1	0.2	10.6
Adult S 1	73.6	23.35	2.9	0.15	26.25
Adult S 2	74.8	19.8	5	0.4	24.8
Adult S 3	73.8	21.6	4.1	0.5	25.7
Adult S 4	72	22.5	4.75	0.75	27.25
Adult S 5	75.1	21.15	3.3	0.45	24.45
Adult S 6	77.5	19.5	2.75	0.25	22.25
Adult S+I 1	59.15	28.35	8.8	3.7	37.15
Adult S+I 2	64.4	30.1	4.85	0.65	34.95
Adult S+I 3	64.9	19.6	13.1	2.4	32.7
Adult S+I 4	66.55	29.1	2.5	1.85	31.6
Adult S+I 5	61.25	29.85	6.95	1.95	36.8
Adult S+I 6	57.79	31.35	9.71	1.15	41.06
Juv C 1	99.95	0.05	0	0	0.05
Juv C 2	98.95	0.85	0	0.2	0.85
Juv C 3	100	0	0	0	0
Juv C 4	99.95	0.05	0	0	0.05
Juv C 5	99.95	0.05	0	0	0.05
Juv C 6	99.95	0.05	0	0	0.05
Juv S 1	83.2	16.35	0	0.45	16.35
Juv S 2	85.15	14.55	0	0.3	14.55
Juv S 3	83.15	16.5	0.15	0.2	16.65
Juv S 4	83.3	16.25	0.15	0.3	16.4
Juv S 5	83.45	16.25	0	0.3	16.25
Juv S 6	83.65	15.9	0.1	0.35	16
Juv S+I 1	82.65	17.2	0	0.15	17.2
Juv S+I 2	83.8	15.5	0.3	0.4	15.8
Juv S+I 3	85.2	14.5	0.1	0.2	14.6
Juv S+I 4	84.5	14.6	0.25	0.65	14.85
Juv S+I 5	83.85	15.5	0.35	0.3	15.85
Juv S+I 6	79.1	19.7	0.7	0.5	20.4
